# Supplementary material for: Epidemiological Identification of A Novel Pathogen in Real Time: Analysis of the Atypical Pneumonia Outbreak in Wuhan, China, 2019–2020
Source: MDPI journal article supplement (doi:10.3390/jcm9030637), 2020-02-27
Supplement: s1 [file s1]

**Table S1.** Estimated values of the probability of Disease X, given available information at different timepoints using Hamming distance and including wet market exposure.

| Hamming distance, with wet market |           |      |      |             |             |                               |              |              |       |                         |                          |               |                      |
|-----------------------------------|-----------|------|------|-------------|-------------|-------------------------------|--------------|--------------|-------|-------------------------|--------------------------|---------------|----------------------|
| Date                              | Disease X | SARS | MERS | HPAI (H5N1) | HPAI (H7N9) | Other<br>Influenza<br>viruses | Adenoviruses | Hantaviruses | RSV   | Chlamydia<br>pneumoniae | Mycoplasma<br>pneumoniae | Legionellosis | Equal<br>probability |
| 30-Dec                            | 8.3%      | 8.3% | 8.3% | 8.3%        | 8.3%        | 8.3%                          | 8.3%         | 8.3%         | 8.3%  | 8.3%                    | 8.3%                     | 8.3%          | 8.3%                 |
| 31-Dec                            | 54.3%     | 1.0% | 0.1% | 7.4%        | 20.0%       | 2.7%                          | 2.7%         | 2.7%         | 7.4%  | 0.4%                    | 1.0%                     | 0.4%          | 8.3%                 |
| 1-Jan                             | 54.3%     | 1.0% | 0.1% | 7.4%        | 20.0%       | 2.7%                          | 2.7%         | 2.7%         | 7.4%  | 0.4%                    | 1.0%                     | 0.4%          | 8.3%                 |
| 2-Jan                             | 54.3%     | 1.0% | 0.1% | 7.4%        | 20.0%       | 2.7%                          | 2.7%         | 2.7%         | 7.4%  | 0.4%                    | 1.0%                     | 0.4%          | 8.3%                 |
| 3-Jan                             | 80.8%     | 1.5% | 0.2% |             |             |                               |              | 4.0%         | 10.9% | 0.5%                    | 1.5%                     | 0.5%          | 12.5%                |
| 4-Jan                             | 80.8%     | 1.5% | 0.2% |             |             |                               |              | 4.0%         | 10.9% | 0.5%                    | 1.5%                     | 0.5%          | 12.5%                |
| 5-Jan                             | 82.2%     |      |      |             |             |                               |              | 4.1%         | 11.1% | 0.6%                    | 1.5%                     | 0.6%          | 16.7%                |
| 6-Jan                             | 82.2%     |      |      |             |             |                               |              | 4.1%         | 11.1% | 0.6%                    | 1.5%                     | 0.6%          | 16.7%                |
| 7-Jan                             | 82.2%     |      |      |             |             |                               |              | 4.1%         | 11.1% | 0.6%                    | 1.5%                     | 0.6%          | 16.7%                |
| 8-Jan                             | 82.2%     |      |      |             |             |                               |              | 4.1%         | 11.1% | 0.6%                    | 1.5%                     | 0.6%          | 16.7%                |
| 9-Jan                             | 82.2%     |      |      |             |             |                               |              | 4.1%         | 11.1% | 0.6%                    | 1.5%                     | 0.6%          | 16.7%                |
| 10-Jan                            | 82.2%     |      |      |             |             |                               |              | 4.1%         | 11.1% | 0.6%                    | 1.5%                     | 0.6%          | 16.7%                |
| 11-Jan                            | 82.2%     |      |      |             |             |                               |              | 4.1%         | 11.1% | 0.6%                    | 1.5%                     | 0.6%          | 16.7%                |
| 12-Jan                            | 82.2%     |      |      |             |             |                               |              | 4.1%         | 11.1% | 0.6%                    | 1.5%                     | 0.6%          | 16.7%                |

SARS, Severe acute respiratory syndrome; MERS, Middle East respiratory syndrome; HPAI, Highly pathogenic avian influenza; RSV, Respiratory syncytial virus.

**Table S2.** Estimated values of the probability of Disease X, given available information at different timepoints using Euclidean distance and including wet market exposure.

| Euclidean distance, with wet market |           |      |      |             |             |                               |              |              |       |                         |                          |               |                      |
|-------------------------------------|-----------|------|------|-------------|-------------|-------------------------------|--------------|--------------|-------|-------------------------|--------------------------|---------------|----------------------|
| Date                                | Disease X | SARS | MERS | HPAI (H5N1) | HPAI (H7N9) | Other<br>Influenza<br>viruses | Adenoviruses | Hantaviruses | RSV   | Chlamydia<br>pneumoniae | Mycoplasma<br>pneumoniae | Legionellosis | Equal<br>probability |
| 30-Dec                              | 8.3%      | 8.3% | 8.3% | 8.3%        | 8.3%        | 8.3%                          | 8.3%         | 8.3%         | 8.3%  | 8.3%                    | 8.3%                     | 8.3%          | 8.3%                 |
| 31-Dec                              | 33.8%     | 4.6% | 2.9% | 8.2%        | 12.4%       | 6.0%                          | 6.0%         | 6.0%         | 8.2%  | 3.6%                    | 4.6%                     | 3.6%          | 8.3%                 |
| 1-Jan                               | 33.8%     | 4.6% | 2.9% | 8.2%        | 12.4%       | 6.0%                          | 6.0%         | 6.0%         | 8.2%  | 3.6%                    | 4.6%                     | 3.6%          | 8.3%                 |
| 2-Jan                               | 33.8%     | 4.6% | 2.9% | 8.2%        | 12.4%       | 6.0%                          | 6.0%         | 6.0%         | 8.2%  | 3.6%                    | 4.6%                     | 3.6%          | 8.3%                 |
| 3-Jan                               | 50.2%     | 6.8% | 4.3% |             |             |                               |              | 8.9%         | 12.2% | 5.4%                    | 6.8%                     | 5.4%          | 12.5%                |
| 4-Jan                               | 50.2%     | 6.8% | 4.3% |             |             |                               |              | 8.9%         | 12.2% | 5.4%                    | 6.8%                     | 5.4%          | 12.5%                |
| 5-Jan                               | 56.5%     |      |      |             |             |                               |              | 10.0%        | 13.7% | 6.0%                    | 7.6%                     | 6.0%          | 16.7%                |
| 6-Jan                               | 56.5%     |      |      |             |             |                               |              | 10.0%        | 13.7% | 6.0%                    | 7.6%                     | 6.0%          | 16.7%                |
| 7-Jan                               | 56.5%     |      |      |             |             |                               |              | 10.0%        | 13.7% | 6.0%                    | 7.6%                     | 6.0%          | 16.7%                |
| 8-Jan                               | 56.5%     |      |      |             |             |                               |              | 10.0%        | 13.7% | 6.0%                    | 7.6%                     | 6.0%          | 16.7%                |
| 9-Jan                               | 56.5%     |      |      |             |             |                               |              | 10.0%        | 13.7% | 6.0%                    | 7.6%                     | 6.0%          | 16.7%                |
| 10-Jan                              | 56.5%     |      |      |             |             |                               |              | 10.0%        | 13.7% | 6.0%                    | 7.6%                     | 6.0%          | 16.7%                |
| 11-Jan                              | 56.5%     |      |      |             |             |                               |              | 10.0%        | 13.7% | 6.0%                    | 7.6%                     | 6.0%          | 16.7%                |
| 12-Jan                              | 56.5%     |      |      |             |             |                               |              | 10.0%        | 13.7% | 6.0%                    | 7.6%                     | 6.0%          | 16.7%                |

SARS, Severe acute respiratory syndrome; MERS, Middle East respiratory syndrome; HPAI, Highly pathogenic avian influenza; RSV, Respiratory syncytial virus.

**Table S3.** Estimated values of the probability of Disease X, given available information at different timepoints using Hamming distance and excluding wet market exposure.

| Hamming distance, without wet market |           |      |      |             |             |                               |              |              |       |                         |                          |               |                      |
|--------------------------------------|-----------|------|------|-------------|-------------|-------------------------------|--------------|--------------|-------|-------------------------|--------------------------|---------------|----------------------|
| Date                                 | Disease X | SARS | MERS | HPAI (H5N1) | HPAI (H7N9) | Other<br>Influenza<br>viruses | Adenoviruses | Hantaviruses | RSV   | Chlamydia<br>pneumoniae | Mycoplasma<br>pneumoniae | Legionellosis | Equal<br>probability |
| 30-Dec                               | 8.3%      | 8.3% | 8.3% | 8.3%        | 8.3%        | 8.3%                          | 8.3%         | 8.3%         | 8.3%  | 8.3%                    | 8.3%                     | 8.3%          | 8.3%                 |
| 31-Dec                               | 41.3%     | 2.1% | 0.3% | 5.6%        | 15.2%       | 5.6%                          | 5.6%         | 5.6%         | 15.2% | 0.8%                    | 2.1%                     | 0.8%          | 8.3%                 |
| 1-Jan                                | 41.3%     | 2.1% | 0.3% | 5.6%        | 15.2%       | 5.6%                          | 5.6%         | 5.6%         | 15.2% | 0.8%                    | 2.1%                     | 0.8%          | 8.3%                 |
| 2-Jan                                | 41.3%     | 2.1% | 0.3% | 5.6%        | 15.2%       | 5.6%                          | 5.6%         | 5.6%         | 15.2% | 0.8%                    | 2.1%                     | 0.8%          | 8.3%                 |
| 3-Jan                                | 60.7%     | 3.0% | 0.4% |             |             |                               |              | 8.2%         | 22.3% | 1.1%                    | 3.0%                     | 1.1%          | 12.5%                |
| 4-Jan                                | 60.7%     | 3.0% | 0.4% |             |             |                               |              | 8.2%         | 22.3% | 1.1%                    | 3.0%                     | 1.1%          | 12.5%                |
| 5-Jan                                | 62.9%     |      |      |             |             |                               |              | 8.5%         | 23.1% | 1.2%                    | 3.1%                     | 1.2%          | 16.7%                |
| 6-Jan                                | 62.9%     |      |      |             |             |                               |              | 8.5%         | 23.1% | 1.2%                    | 3.1%                     | 1.2%          | 16.7%                |
| 7-Jan                                | 62.9%     |      |      |             |             |                               |              | 8.5%         | 23.1% | 1.2%                    | 3.1%                     | 1.2%          | 16.7%                |
| 8-Jan                                | 62.9%     |      |      |             |             |                               |              | 8.5%         | 23.1% | 1.2%                    | 3.1%                     | 1.2%          | 16.7%                |
| 9-Jan                                | 62.9%     |      |      |             |             |                               |              | 8.5%         | 23.1% | 1.2%                    | 3.1%                     | 1.2%          | 16.7%                |
| 10-Jan                               | 62.9%     |      |      |             |             |                               |              | 8.5%         | 23.1% | 1.2%                    | 3.1%                     | 1.2%          | 16.7%                |
| 11-Jan                               | 62.9%     |      |      |             |             |                               |              | 8.5%         | 23.1% | 1.2%                    | 3.1%                     | 1.2%          | 16.7%                |
| 12-Jan                               | 62.9%     |      |      |             |             |                               |              | 8.5%         | 23.1% | 1.2%                    | 3.1%                     | 1.2%          | 16.7%                |

SARS, Severe acute respiratory syndrome; MERS, Middle East respiratory syndrome; HPAI, Highly pathogenic avian influenza; RSV, Respiratory syncytial virus.

**Table S4.** Estimated values of the probability of Disease X, given available information at different timepoints using Euclidean distance and excluding wet market exposure.

| Euclidean distance, without wet market |           |      |      |             |             |                               |              |              |       |                         |                          |               |                      |
|----------------------------------------|-----------|------|------|-------------|-------------|-------------------------------|--------------|--------------|-------|-------------------------|--------------------------|---------------|----------------------|
| Date                                   | Disease X | SARS | MERS | HPAI (H5N1) | HPAI (H7N9) | Other<br>Influenza<br>viruses | Adenoviruses | Hantaviruses | RSV   | Chlamydia<br>pneumoniae | Mycoplasma<br>pneumoniae | Legionellosis | Equal<br>probability |
| 30-Dec                                 | 8.3%      | 8.3% | 8.3% | 8.3%        | 8.3%        | 8.3%                          | 8.3%         | 8.3%         | 8.3%  | 8.3%                    | 8.3%                     | 8.3%          | 8.3%                 |
| 31-Dec                                 | 29.1%     | 5.1% | 3.1% | 7.1%        | 10.7%       | 7.1%                          | 7.1%         | 7.1%         | 10.7% | 3.9%                    | 5.1%                     | 3.9%          | 8.3%                 |
| 1-Jan                                  | 29.1%     | 5.1% | 3.1% | 7.1%        | 10.7%       | 7.1%                          | 7.1%         | 7.1%         | 10.7% | 3.9%                    | 5.1%                     | 3.9%          | 8.3%                 |
| 2-Jan                                  | 29.1%     | 5.1% | 3.1% | 7.1%        | 10.7%       | 7.1%                          | 7.1%         | 7.1%         | 10.7% | 3.9%                    | 5.1%                     | 3.9%          | 8.3%                 |
| 3-Jan                                  | 42.7%     | 7.6% | 4.6% |             |             |                               |              | 10.4%        | 15.7% | 5.8%                    | 7.6%                     | 5.8%          | 12.5%                |
| 4-Jan                                  | 42.7%     | 7.6% | 4.6% |             |             |                               |              | 10.4%        | 15.7% | 5.8%                    | 7.6%                     | 5.8%          | 12.5%                |
| 5-Jan                                  | 48.6%     |      |      |             |             |                               |              | 11.8%        | 17.9% | 6.6%                    | 8.6%                     | 6.6%          | 16.7%                |
| 6-Jan                                  | 48.6%     |      |      |             |             |                               |              | 11.8%        | 17.9% | 6.6%                    | 8.6%                     | 6.6%          | 16.7%                |
| 7-Jan                                  | 48.6%     |      |      |             |             |                               |              | 11.8%        | 17.9% | 6.6%                    | 8.6%                     | 6.6%          | 16.7%                |
| 8-Jan                                  | 48.6%     |      |      |             |             |                               |              | 11.8%        | 17.9% | 6.6%                    | 8.6%                     | 6.6%          | 16.7%                |
| 9-Jan                                  | 48.6%     |      |      |             |             |                               |              | 11.8%        | 17.9% | 6.6%                    | 8.6%                     | 6.6%          | 16.7%                |
| 10-Jan                                 | 48.6%     |      |      |             |             |                               |              | 11.8%        | 17.9% | 6.6%                    | 8.6%                     | 6.6%          | 16.7%                |
| 11-Jan                                 | 48.6%     |      |      |             |             |                               |              | 11.8%        | 17.9% | 6.6%                    | 8.6%                     | 6.6%          | 16.7%                |
| 12-Jan                                 | 48.6%     |      |      |             |             |                               |              | 11.8%        | 17.9% | 6.6%                    | 8.6%                     | 6.6%          | 16.7%                |

SARS, Severe acute respiratory syndrome; MERS, Middle East respiratory syndrome; HPAI, Highly pathogenic avian influenza; RSV, Respiratory syncytial virus.
